# Supplementary material for: A high-performance SERS-imprinted sensor doped with silver particles of different surface morphologies for selective detection of pyrethroids in rivers
Source: Royal Society of Chemistry journal article supplement (doi:10.1039/c7nj02811c), 2017-01-01
Supplement: c7nj02811c1.pdf [file c7nj02811c1.pdf]

## SUPPLEMENTARY INFORMATION

### **High performance SERS imprinted sensor doped with different surface morphology silver particles for selective detection of pyrethroids in river**

Hongji Li<sup>a</sup>, Xiaonan Wang<sup>b</sup>, Zirun Wang<sup>b</sup>, Jiaqi Jiang<sup>b</sup>, Yu Qiao<sup>c</sup>, Maobin Wei<sup>d</sup>, Yongsheng Yan<sup>a</sup>,  
Chunxiang Li<sup>a\*</sup>

<sup>a</sup>Institute of Green Chemistry and Chemical Technology, College of Chemistry and Chemical  
Engineering, Jiangsu University, Zhenjiang 212013, China

<sup>b</sup>College of Chemistry, Jilin Normal University, Siping, 136000, China

<sup>c</sup>Key Laboratory of Preparation and Applications of Environmental Friendly Materials (Jilin  
Normal University), Ministry of Education, Changchun, 130103, China

<sup>d</sup>College of Physics, Jilin Normal University, Siping, 136000, China

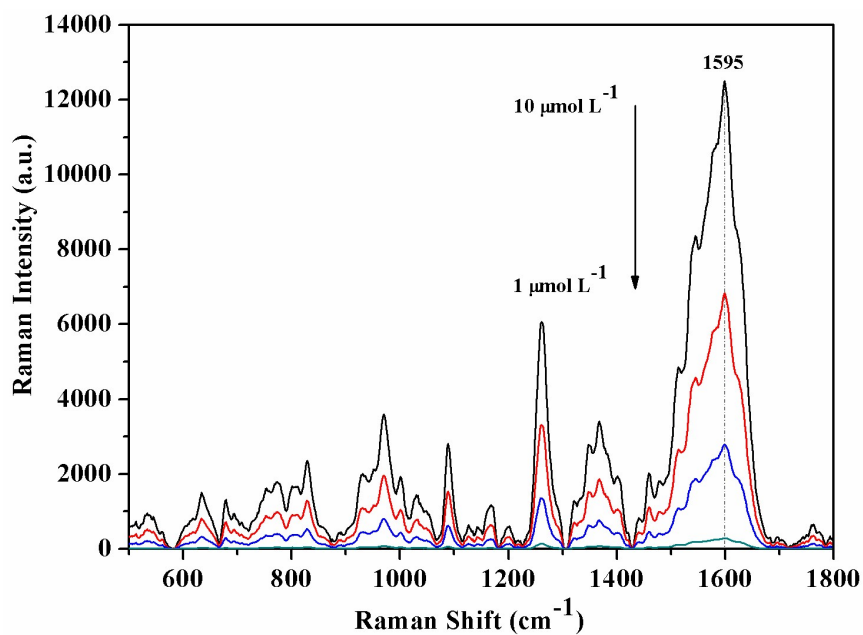

Figure S1. The SERS spectra of different concentrations of LC obtained from Ag particles.

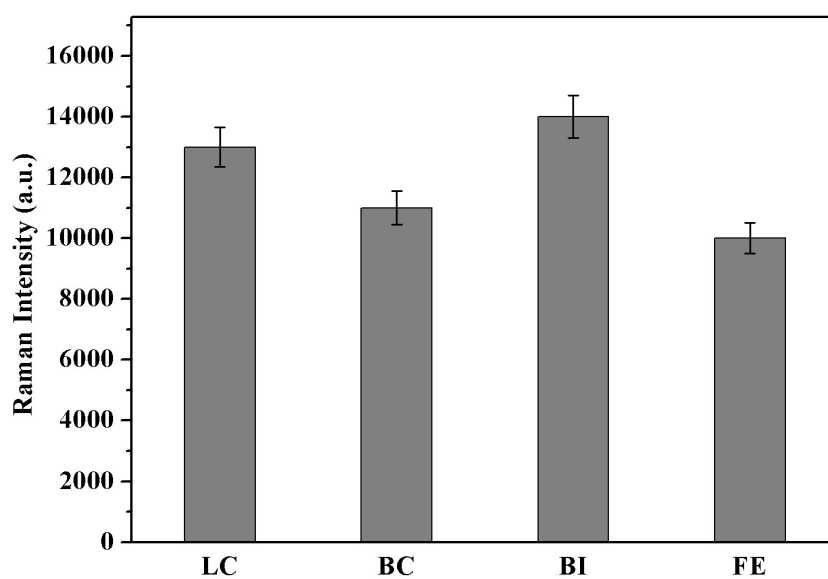

Figure S2. The Raman detection of Ag particles to different pyrethroids under the same concentration of 10 μmol L<sup>-1</sup>.
